# Morphine differentially alters the synaptic and intrinsic properties of D1R- and D2R-expressing medium spiny neurons in the nucleus accumbens

## **Authors:**

Dillon S. McDevitt<sup>1,2</sup>, Benjamin Jonik<sup>3</sup>, and Nicholas M. Graziane<sup>1\*</sup>

## **Author Affiliations:**

<sup>1</sup>Departments of Anesthesiology and Perioperative Medicine, and Pharmacology, Penn State College of Medicine, Hershey, PA 17033, USA

<sup>2</sup>Neuroscience graduate program, Penn State College of Medicine, Hershey, PA 17033, USA

<sup>3</sup>Medical Student Research Program, Penn State College of Medicine, Hershey, PA 17033, USA

## **\*Correspondence to:**

Nicholas Graziane, Ph.D.

E-mail: [ngraziane@pennstatehealth.psu.edu](mailto:ngraziane@pennstatehealth.psu.edu)

Department of Anesthesiology & Perioperative Medicine, H187

Penn State College of Medicine

500 University Drive

Hershey, PA 17033, USA

## **Abstract**

Exposure to opioids reshapes future reward and motivated behaviors partially by altering the functional output of medium spiny neurons (MSNs) in the nucleus accumbens shell. Here, we investigated how morphine, a highly addictive opioid, alters synaptic transmission and intrinsic excitability on dopamine D1-receptor (D1R) expressing and dopamine D2-receptor (D2R) expressing MSNs, the two main output neurons in the nucleus accumbens shell. Using whole-cell electrophysiology recordings, we show, that 24 h abstinence following repeated non-contingent administration of morphine (10 mg/kg, i.p.) in mice reduces miniature excitatory postsynaptic current (mEPSC) frequency and miniature inhibitory postsynaptic current (mIPSC) frequency on D2R-MSNs, with concomitant increases in D2R-MSN intrinsic membrane excitability. We did not observe any changes on synaptic or intrinsic changes on D1R-MSNs. Lastly, in an attempt to determine the integrated effect of the synaptic and intrinsic alterations on the overall functional output of D2R-MSNs, we measured the input-output efficacy by measuring synaptically-driven action potential firing. We found that both D1R-MSN and D2R-MSN output was unchanged following morphine treatment.

## **Keywords:**

Nucleus accumbens, morphine, opioid use disorder, intrinsic excitability, synaptic transmission, neuronal activity

## 1 Introduction

2 Exposure to opioids reshapes future reward and motivated behaviors partially by altering the  
3 functional output of medium spiny neurons (MSNs) in the nucleus accumbens shell, a brain  
4 region central to reward and motivation (Wolf, 2010;Graziane et al., 2016;Hearing et al.,  
5 2016;Scofield et al., 2016). MSNs receive glutamatergic excitatory input from the infralimbic  
6 prefrontal cortex, amygdala, hippocampus, and midline nuclei of the thalamus, while also  
7 receiving inhibitory input locally from interneurons or collateral projections from MSNs or from  
8 other brain regions including the ventral pallidum, lateral septum, periaqueductal gray,  
9 parabrachial nucleus, pedunculopontine tegmentum and ventral tegmental area (Sesack and  
10 Grace, 2010;Lalchandani et al., 2013;Salgado and Kaplitt, 2015;Dobbs et al., 2016;McDevitt and  
11 Graziane, 2018). The integration of these synaptic inputs along with the intrinsic excitability of  
12 medium spiny neurons (MSNs) are, in part, critically important for information transfer through  
13 the reward neurocircuit (Russo et al., 2010;Kourrich et al., 2015).

14 There are two main classes of MSNs in the accumbens shell; dopamine D1-receptor containing  
15 and dopamine D2-receptor containing MSNs (D1R-MSN and D2R-MSN, respectively). These  
16 cell-types not only differ in the dopamine receptor expressed, but also in their projection sites,  
17 peptidergic expression, and modulation of motivated behaviors (Hikida et al., 2010;Lobo et al.,  
18 2010;Smith et al., 2013;Koo et al., 2014;Al-Hasani et al., 2015;Creed et al., 2016;Heinsbroek et  
19 al., 2017;Tejeda et al., 2017;Castro and Bruchas, 2019). Recently, reports have demonstrated that  
20 exposure to morphine differentially alters excitatory glutamatergic transmission on both D1R-  
21 and D2R-MSNs in the accumbens shell (Graziane et al., 2016;Hearing et al., 2016;Hearing et al.,  
22 2018;Madayag et al., 2019). However, little is known regarding how exposure to morphine alters  
23 MSN cell-type specific inhibitory transmission and intrinsic membrane excitability, or how these  
24 synaptic and intrinsic factors integrate to drive future D1R- or D2R-MSN functional output. In  
25 an attempt to identify the effect of morphine exposure on D1R- and D2R-MSN functional output  
26 in the accumbens shell, we investigated how repeated exposure to morphine affected the  
27 integration of excitatory and inhibitory transmission, along with the intrinsic factors that drive  
28 membrane excitability. Finally, we assessed the integrated effect that synaptic and intrinsic  
29 factors had on the overall functional output of MSNs in the accumbens 24 h following morphine  
30 administration.

## 31 2. Materials and methods

### 32 2.1. Animals

33 All experiments were done in accordance with procedures approved by the Pennsylvania State  
34 University College of Medicine Institutional Animal Care and Use Committee. Cell-type specific  
35 D1R- or D2R-MSN recordings were made using male and female B6 *Cg-Tg (Drd1a-tdTomato)*  
36 line 6 Calak/J hemizygous mice, a bacterial artificial chromosome (BAC) transgenic mouse line  
37 initially developed in the laboratory of Dr. Nicole Calakos at Duke University, aged 5-10 weeks  
38 (Ade et al., 2011) (JAX stock #16204). Given that in this transgenic mouse line, D1R-MSNs are  
39 fluorescently labeled, D2R-MSNs were identified based on the lack of fluorescence, cell size,  
40 and electrophysiological characteristics, including capacitance and membrane resistance (**Table**  
41 **I**), as previously published (Graziane et al., 2016). Additionally, as elegantly stated previously  
42 (Willett et al., 2019), unlabeled MSNs in the *Drd1a-tdTomato* line in adult mice nearly

43 exclusively compromise *Drd2*-positive MSNs and to a lesser extent MSNs expressing both D1R  
44 and D2R (D1R/D2R-MSNs) (1.6%) (Ade et al., 2011;Enoksson et al., 2012;Thibault et al.,  
45 2013). Thus, we refer to all unlabeled MSNs from the *Drd1a*-tdTomato line as D2R-MSNs, but  
46 with the full acknowledgement that we are also likely sampling from D1R/D2R-MSNs, but to a  
47 much lesser degree (Bertran-Gonzalez et al., 2008;Ade et al., 2011). Mice were singly-housed  
48 and maintained on a regular 12 hour light/dark cycle (lights on 07:00, lights off 19:00) with *ad*  
49 *libitum* food and water.

## 50 2.2. Drugs

51 (–)-morphine sulfate pentahydrate was provided by the National Institute on Drug Abuse Drug  
52 Supply Program. NBQX and AP5 were purchased from Tocris Biosciences. Picrotoxin was  
53 purchased from Sigma Aldrich. Tetrodotoxin (TTX) was purchased from Enzo.

## 54 2.3. Repeated systemic injections of saline or morphine

55 Before drug administration, mice were allowed to acclimate to their home cages for >5d. For  
56 drug treatment, we used a 5d repeated drug administration procedure (Huang et al.,  
57 2009;Graziane et al., 2016). In all electrophysiological experiments, once per d for 5d, mice were  
58 taken out of the home cages for an intraperitoneal (i.p.) injection of either (–)-morphine sulfate  
59 pentahydrate (10mg/kg in 0.9% saline) or the same volume of 0.9% saline, and then placed back  
60 to the home cage at ~Zeitgeber time (ZT) 2 (ZT0=lights on, ZT12=lights off). Animals were  
61 randomly selected for each drug treatment. Morphine- or saline-treated animals were then used  
62 for electrophysiological recordings ~24h following the last injection.

## 63 2.4. Acute Brain Slice Preparation

64 At ~ZT time 2, mice were deeply anesthetized with isoflurane and cardiac perfused with an ice-  
65 cold NMDG-based cutting solution containing (in mM): 135 N-methyl-d-glutamine, 1 KCl, 1.2  
66 KH<sub>2</sub>PO<sub>4</sub>, 0.5 CaCl<sub>2</sub>, 1.5 MgCl<sub>2</sub>, 20 choline-HCO<sub>3</sub>, and 11 glucose, saturated with  
67 95% O<sub>2</sub>/5% CO<sub>2</sub>, adjusted to a pH of 7.4 with HCl, osmolality adjusted to 305 mmol/kg.  
68 Following perfusion, mice were decapitated and brains were rapidly removed. 250 µm coronal  
69 brain slices containing the nucleus accumbens shell were prepared via a Leica VT1200s  
70 vibratome in 4°C NMDG cutting solution. Following cutting, slices were allowed to recover in  
71 artificial cerebrospinal fluid (aCSF) containing (in mM): 119 NaCl, 2.5 KCl, 2.5 CaCl<sub>2</sub>, 1.3  
72 MgCl<sub>2</sub>, 1 NaH<sub>2</sub>PO<sub>4</sub>, 26.2 NaHCO<sub>3</sub>, and 11 glucose, osmolality of 290 mmol/kg, at 31°C for 30  
73 minutes followed by 30 minutes at 20-22°C prior to recording. After a one hour recovery period,  
74 slices were kept at 20-22°C for the rest of the recording day.

## 75 2.5. Electrophysiology

76 Whole-cell recording. All recordings were made from the nucleus accumbens shell between  
77 Bregma 1.7 mm and 0.86 mm (Paxinos and Franklin, 2004). Slices were transferred to a  
78 recording chamber and neurons were visualized using infrared differential interference contrast  
79 microscopy. During recording, slices were superfused with aCSF at room temperature. For  
80 intrinsic membrane excitability experiments, recording electrodes (2-5 MΩ; borosilicate glass  
81 capillaries (WPI #1B150F-4) pulled on a horizontal puller from Sutter Instruments (model P-97))  
82 were filled with a potassium-based internal solution containing (in mM): 130 KMeSO<sub>3</sub>, 10 KCl,

83 10 HEPES, 0.4 EGTA, 2 MgCl<sub>2</sub>·6H<sub>2</sub>O, 3 Mg-ATP, 0.5 Na-GTP, pH 7.2-7.4, osmolality=290  
84 mmol/kg (Wescor Vapro Model 5600, ElitechGroup). Resting membrane potential was recorded  
85 immediately following break-in. Before beginning the protocol, cells were adjusted to a resting  
86 membrane voltage of -80mV. This typically was achieved with less than 30 pA current injection,  
87 and cells were discarded if the current needed to adjust the cell to -80 mV was greater than 50  
88 pA. A current step protocol consisting of 600 ms steps ranging from -200 to +450 pA in 50 pA  
89 increments was carried out with a 20 s intra-sweep interval. The number of action potentials  
90 observed at each current step was recorded.

91 For synaptically-driven action potential experiments or rheobase/chronaxie measurements, a  
92 stimulation electrode (size, 2.5–3 MΩ), filled with aCSF, was placed 100 μm from the recorded  
93 neuron along the same z plane in three dimensional space. Recordings were performed using  
94 KMeSO<sub>3</sub> as described above. The resting membrane potential was not adjusted, enabling neurons  
95 to fire action potentials. The average membrane potential during electrophysiology recordings  
96 was -85.3±0.78 mV, which deviated by 4.39±0.40 mV (n=50) throughout the entirety of the  
97 experiment. For synaptically-driven action potential experiments, a 10 Hz stimulus with a  
98 stimulus duration of 0.25 ms and stimulus strength ranging from 0-100 μAmps of current, with  
99 an interval of 5 μAmps, was applied through the stimulating electrode. For each current, this  
100 procedure was repeated three times and the average number of action potentials/10 Hz stimulus  
101 was recorded. Rheobase/chronaxie measurements were made by varying the stimulus duration  
102 from 2-0.2 μAmps and injecting current at each duration until an action potential was evoked  
103 from the recorded neuron. The stimulus duration was plotted over the current which elicited an  
104 action potential. The rheobase was calculated as the plateau of a two-phase decay nonlinear  
105 regression curve fit. The chronaxie was calculated, using GraphPad Prism software, as the  
106 duration corresponding to 2x the rheobase, by solving for x in the equation,  
107  $\text{rheobase} \cdot 2 = \text{rheobase} + \text{SpanFast} \cdot \exp(-K\text{Fast} \cdot x) + \text{SpanSlow} \cdot \exp(-K\text{Slow} \cdot x)$ .

108 For excitatory/inhibitory ratio (E/I) experiments (Liu et al., 2016), recording electrodes (2-5 MΩ)  
109 were filled with a cesium-based internal solution (in mM): 135 CsMeSO<sub>3</sub>, 5 CsCl, 5 TEA-Cl,  
110 0.4 EGTA (Cs), 20 HEPES, 2.5 Mg-ATP, 0.25 Na-GTP, 1 QX-314 (Br), pH 7.2-7.4,  
111 osmolality=290 mmol/kg. This internal solution was selected i) to isolate synaptically-evoked  
112 currents (cesium and QX-314 block voltage-gated K<sup>+</sup> and Na<sup>+</sup> channels, respectively) and ii) to  
113 measure the E/I ratios at physiologically relevant ionic driving forces while MSNs were voltage  
114 clamped at -70 mV (-70 mV is similar to the membrane potential of MSNs during synaptically-  
115 driven action potential and rheobase/chronaxie measurements, which were performed in current  
116 clamp) (using this internal solution the reversal potential for γ-aminobutyric acid<sub>A</sub> (GABA<sub>A</sub>)  
117 receptor/glycine receptors (receptors likely mediating inhibitory postsynaptic currents (IPSCs)  
118 and AMPA/kainate receptors (receptors mediating excitatory postsynaptic currents (EPSCs)) is  
119 ~-60 mV and ~0 mV, respectively). To evoke postsynaptic currents, presynaptic afferents were  
120 stimulated via a constant-current stimulator (Digitimer) using a monopolar stimulating electrode  
121 (glass pipette filled with aCSF) at 0.1 Hz with 0.1 ms stimulus duration. Cells were held at -70  
122 mV for the entirety of the experiment. Once a stable baseline was observed near 200 pA of  
123 current, 50 traces were recorded. Following this, NBQX (2 μM) and AP5 (50 μM) were bath  
124 applied to isolate inhibitory ionotropic receptor-mediated currents. The drug was allowed to  
125 wash on, and 50 more sweeps were recorded. The AMPA/kainate receptor-mediated current was  
126 then obtained via digital subtraction of the inhibitory ionotropic receptor-mediated current from

127 the mixed current. The E/I ratio was then calculated by taking the peak amplitude of the  
128 AMPA/kainate receptor-mediated current divided by the peak amplitude of the inhibitory  
129 ionotropic receptor-mediated current in male or female mice.

130 E-I balance assessments investigating temporal relationships between excitatory and inhibitory  
131 current were carried out in male mice by measuring spontaneous events using cesium based  
132 internal solution (see recipe above) and aCSF. Neurons were held at -30 mV in order to elicit  
133 inward excitatory current and outward inhibitory current, as done previously (Zhou et al., 2009).  
134 Recordings lasted three minutes and analysis was performed using MiniAnalysis software. A  
135 computer program built in Visual Studio was used to calculate the inter-event intervals of sEPSC  
136 and sIPSCs.

137 Miniature excitatory or inhibitory postsynaptic current (mEPSC or mIPSC, respectively)  
138 recordings were performed in the presence of tetrodotoxin (1  $\mu$ M), a Na<sup>+</sup> channel blocker.  
139 mEPSCs were recorded in the presence of picrotoxin (100  $\mu$ M) and mIPSCs were recorded in the  
140 presence of NBQX (2  $\mu$ M). For mEPSC recordings, recording electrodes (2-5 M $\Omega$ ) were filled  
141 with cesium-based internal solution as described above. For mIPSC recordings, recording  
142 electrodes (2-5 M $\Omega$ ) were filled with high chloride cesium-based internal solution (in mM): 15  
143 CsMeSO<sub>3</sub>, 120 CsCl, 8 NaCl, 0.5 EGTA (Cs), 10 HEPES, 2.0 Mg-ATP, 0.3 Na-GTP, 5 QX-314  
144 (Br), pH 7.2-7.4, osmolality=290 mmol/kg. High chloride cesium-based internal solution was  
145 used for mIPSC recordings so that mIPSCs could be detected in neurons voltage clamped at -70  
146 mV ( $\gamma$ -aminobutyric acid<sub>A</sub> (GABA<sub>A</sub>) receptor/glycine receptor reversal potential= $\sim$ 0 mV).  
147 Events during a stable 10 min period were analyzed using Sutter software (Pernia-Andrade et al.,  
148 2012). Decay tau corresponds to the time constant of decay time, which equals the 10-90% decay  
149 time. The rise time equals 10-90% rise time.

150 All recordings were performed using either an Axon Multiclamp 700B amplifier or Sutter  
151 Double IPA, filtered at 2-3 kHz, and digitized at 20 kHz. Series resistance was typically 10-25  
152 M $\Omega$ , left uncompensated, and monitored throughout. For all voltage clamp recordings, cells with  
153 a series resistance variation greater than 20% were discarded from analysis. For all current clamp  
154 recordings, cells with a bridge balance that varied greater than 20% during the start and end of  
155 recordings were discarded from analysis.

## 156 2.6. Statistical Analysis

157 All results are shown as mean $\pm$ SEM. Each experiment was replicated in at least 3 animals. No  
158 data points were excluded. Sample size was presented as n/m, where “n” refers to the number of  
159 cells and “m” refers to the number of animals. Statistical significance was assessed in GraphPad  
160 Prism software using a one- or two-way ANOVA with Bonferroni’s correction for multiple  
161 comparisons in order to identify differences as specified. F values for two-way ANOVA  
162 statistical comparisons represent interactions between variables unless otherwise stated. Two-tail  
163 tests were performed for all studies. Our goal, a priori, was to examine pairwise comparisons  
164 between drug treatment and cell type combinations regardless if the interaction effect between  
165 drug treatment and cell type was strong. Thus, prior to analysis, we created all possible  
166 independent groups based on drug treatment and cell type combinations and performed a one-  
167 way ANOVA with pairwise comparisons. The results from these pairwise comparisons from this  
168 one-way ANOVA would be equivalent to performing a two-way ANOVA with an interaction

169 term (drug treatment, cell type, drug treatment\*cell type interaction) and then performing post-  
170 hoc pairwise comparisons on the interaction term from the two-way ANOVA model.

### 171 3. Results

#### 172 3.1. Morphine reduces synaptic transmission on D2R-MSNs

173 Previously, it was found that exposing mice to a dosing regimen (i.p. 10 mg/kg per d for 5 d, 1-d  
174 forced abstinence) that induces locomotor sensitization and conditioned place preference  
175 generates silent synapse expression preferentially on D2R-MSNs, but not D1R-MSNs, via  
176 removal of AMPA receptors from mature synapses (Graziane et al., 2016). The removal of  
177 AMPA receptors from the synapse is expected to change the number of release sites (n) when  
178 AMPA receptor-mediated transmission is the readout (Hanse et al., 2013), which results in a  
179 change in frequency of quantal events (Kerchner and Nicoll, 2008). Based on this, we assessed  
180 morphine-induced quantal changes in D1R- or D2R-MSN synaptic transmission by measuring  
181 mEPSCs. We found that 24 h following repeated morphine treatment, D1R-MSNs showed no  
182 changes in mEPSC amplitude (Bonferroni post-test,  $p>0.999$ ) (**Figs. 1A, B, D**), and this was also  
183 observed on D2R-MSNs (Bonferroni post-test,  $p>0.999$ ) (**Figs. 1A, C, D**). Furthermore, analysis  
184 of mEPSC frequency following morphine exposure showed no effect on D1R-MSNs (Bonferroni  
185 post-test,  $p=0.19$ ) (**Figs. 1E and G**). However, post-hoc analysis revealed a significant difference  
186 between mEPSC frequency following morphine exposure on D2R-MSNs (Bonferroni post-test,  
187  $p=0.01$ ) (**Figs. 1F and G**). Lastly, we analyzed the receptor rise time and decay tau of mEPSCs  
188 in order to measure whether the significant effects observed were potentially mediated by  
189 changes in AMPA/kainate receptor kinetics. We found, in all groups, the receptor kinetics, rise  
190 time and decay tau, remained unchanged (Rise time:  $F_{(3,42)}=0.371$ ,  $p=0.77$ ; One-way ANOVA;  
191 decay tau:  $F_{(3,42)}=0.290$ ,  $p=0.83$ ; One-way ANOVA) (**Fig. 1H and I**). Based on previously  
192 published findings (Graziane et al., 2016), it is likely that the observed morphine-induced  
193 decreases in D2R-MSN mEPSC frequency are caused by a reduction in the number of release  
194 sites (n) due to morphine-induced AMPA receptor removal from mature D2R-MSN synapses.

195 The functional output of MSNs in the nucleus accumbens relies upon the integration of  
196 excitatory and inhibitory synaptic transmission (Plenz and Kitai, 1998; Wickens and Wilson,  
197 1998; Wolf et al., 2005; Otaka et al., 2013). To measure whether morphine-induced changes in  
198 mEPSC frequency on D2R-MSNs are sufficient to impact the excitatory and inhibitory balance  
199 of synaptic input, we measured the ratio of excitatory ionotropic receptor-mediated current to  
200 inhibitory ionotropic receptor-mediated current (E/I ratio) following an electrically evoked  
201 stimulus while MSNs were voltage-clamped at -70 mV. We found that 24 h post morphine  
202 treatment the E/I ratios were unchanged on D1R- or D2R-MSNs ( $F_{(3,37)}=1.27$ ,  $p=0.30$ ; One-way  
203 ANOVA) (**Fig. 2A and B**). Given that the temporal integration of excitatory and inhibitory  
204 synaptic transmission regulates neuronal activity (Wehr and Zador, 2003; Higley and Contreras,  
205 2006; Okun and Lampl, 2008; Hiratani and Fukai, 2017; Roland et al., 2017; Bhatia et al., 2019),  
206 we investigated whether morphine administration altered the temporal relationship between  
207 excitation and inhibition on D1R- or D2R-MSNs. In order to test this, we recorded spontaneous  
208 EPSCs (sEPSCs) and sIPSCs while voltage clamping D1R- or D2R-MSNs at -30 mV, which  
209 enabled us to simultaneously detect EPSCs (inward current with a reversal at ~0 mV (Lee et al.,  
210 2013)) and IPSCs (outward current with a reversal potential at ~-60 mV; **Table II**) within each  
211 neuron, as previously demonstrated (Zhou et al., 2009). Measuring spontaneous activity was  
212 chosen in order to sample both action potential mediated and non-action potential mediated

213 events, encompassing synaptic populations sampled during evoked stimulation or miniature  
214 postsynaptic current recordings, respectively (He et al., 2018). With this approach, we were able  
215 to measure the temporal relationship between sEPSCs and sIPSCs as well as the balance of  
216 excitatory to inhibitory transmission on D1R- or D2R-MSNs (**Fig. 2C**). Our results show that  
217 morphine exposure did not alter the temporal relationship between excitatory and inhibitory  
218 events as we did not observe any changes in the inter-event interval between sEPSCs to sIPSCs  
219 ( $F_{(3,27)}=0.198$ ,  $p=0.90$ , one-way ANOVA) (**Fig. 2D**) or from sIPSCs to sEPSCs ( $F_{(3,27)}=0.072$ ,  
220  $p=0.97$ , one-way ANOVA) (**Fig. 2E**). Additionally, we did not observe any morphine-induced  
221 changes in the excitation to inhibition balance measured by taking the sEPSC/sIPSC frequency  
222 ratio on D1R- or D2R-MSNs ( $F_{(3,27)}=0.339$ ,  $p=0.80$ , one-way ANOVA) (**Fig. 2F**), suggesting  
223 that the relationship between spontaneous postsynaptic excitatory and inhibitory currents within  
224 a neuron are unaffected by morphine treatment, despite the observed changes in mEPSC  
225 frequency.

226 Because E/I ratios are dependent upon changes in excitatory and/or inhibitory synaptic  
227 transmission, we next investigated whether inhibitory transmission on D1R- or D2R-MSNs was  
228 altered 24 h following morphine treatment, by measuring miniature inhibitory postsynaptic  
229 currents (mIPSCs) (**Fig. 3A**). First, we measured mIPSC amplitude on D1R- or D2R-MSNs. We  
230 found that following morphine treatment, there was no significant change in the mIPSC  
231 amplitude on D1R-MSNs (Bonferroni post-test,  $p>0.999$ ) (**Figs. 3B and D**) or on D2R-MSNs  
232 (Bonferroni post-test,  $p>0.999$ ) (**Figs. 3C and D**). Furthermore, when measuring the mIPSC  
233 frequency, our data revealed no significant morphine-induced change on D1R-MSNs  
234 (Bonferroni post-test,  $p=0.949$ ) **Figs. 3E-G**). However, morphine abstinence elicited a significant  
235 decrease in mIPSC frequency on D2R-MSNs (Bonferroni post-test,  $p<0.0001$ ) (**Figs. 3F and G**).  
236 We also found that basal levels of mIPSC frequency were significantly greater on D2R-MSNs  
237 compared to D1R-MSNs (Bonferroni post-test,  $p=0.02$ ). Lastly, to measure whether inhibitory  
238 ionotropic receptor kinetics were potentially a factor in the observed changes, we measured  
239 mIPSC rise time and decay tau (**Fig. 3H and I**). We found, in all groups, the receptor kinetics,  
240 rise time and decay tau, remained unchanged (rise time:  $F_{(3,65)}=1.69$ ,  $p=0.18$ ; decay tau:  
241  $F_{(3,65)}=1.62$ ,  $p=0.19$ ; one-way ANOVA).

### 242 *3.2. Morphine increases the intrinsic membrane excitability of D2R-MSNs*

243 MSNs in the nucleus accumbens shell display bistable membrane potential properties  
244 characterized by a hyperpolarized quiescent “down” state and a depolarized “up” state associated  
245 with neuronal discharge (O'Donnell et al., 1999). These states are controlled by combined  
246 excitatory synaptic discharge and intrinsic membrane excitability (Huang et al., 2011), which are  
247 posited to bring the membrane potential close to the MSN firing threshold, thus impacting the  
248 efficiency of information relay to downstream brain regions (O'Donnell and Grace,  
249 1995; Ishikawa et al., 2009). Given our observed changes in synaptically-mediated excitatory and  
250 inhibitory transmission on D2R-MSNs (**Figs. 1 and 3**), our next experiment tested whether  
251 morphine impacts cell-type specific MSN intrinsic membrane excitability. To do this, using  
252 whole-cell electrophysiological recordings, we measured the number of action potentials in  
253 response to depolarizing currents, as this approach is often used to measure intrinsic membrane  
254 excitability (Desai et al., 1999; Nelson et al., 2003; Zhang and Linden, 2003; Heng et al.,  
255 2008; Ishikawa et al., 2009; Wang et al., 2018). We found that during morphine abstinence, there  
256 were no changes on D1R-MSN membrane excitability (Bonferroni post-test at each current



257 injected,  $p > 0.999$ ) (**Fig. 4A and B**). However, the morphine-induced decreases in synaptic input  
258 onto D2R-MSNs (**Figs. 1 and 3**) were accompanied by an overall increase in the intrinsic  
259 membrane excitability at currents of  $\geq 250$  pA (Bonferroni post-test, 250 pA:  $p = 0.008$ ; 300 pA:  
260  $p = 0.0003$ ; 350-450 pA:  $p < 0.0001$ ) (**Fig. 4A and C**).

### 261 *3.3. D2R-MSN synaptically driven functional output is unchanged following morphine treatment*

262 Our present findings demonstrate that morphine exposure decreases mEPSC or mIPSC  
263 frequency and increases the intrinsic membrane excitability on D2R-MSNs. In an attempt to  
264 determine the integrated effect of these alterations on the overall functional output of D2R-  
265 MSNs, we measured the input-output efficacy by measuring synaptically-driven action potential  
266 firing (Hopf et al., 2003; Otaka et al., 2013). This was performed by counting the number of  
267 action potentials generated on D1R- or D2R-MSNs when varying currents (0-100  $\mu$ A, 5  $\mu$ A  
268 increments) were injected through a stimulating electrode during a 10 Hz stimulus. These  
269 measurements were performed in the absence of pharmacological blockers in the bath solution,  
270 thus cell-type specific MSN responses were influenced by mixed excitatory and inhibitory inputs  
271 (see Materials and Methods). Following morphine treatment, stimulating afferents in the nucleus  
272 accumbens elicited similar NBQX-sensitive action potential responses (**Fig. 5A**) in D1R- (**Fig.**  
273 **5B**) or D2R-MSNs (**Fig. 5C**) compared to saline controls (D1R-MSN:  $F_{(20,220)} = 0.349$ ,  $p = 0.996$ ;  
274 D2R-MSN:  $F_{(20,260)} = 1.05$ ,  $p = 0.409$ , two-way repeated measures ANOVA). Since neuronal  
275 excitability is not only influenced by the current intensity, but also by the temporal aspects of the  
276 current pulse, we constructed strength-duration curves whereby the electrically-evoked current  
277 was plotted over the electrically-evoked current duration (**Fig. 6**). By constructing this curve, we  
278 were able to observe increases or decreases in pre- and postsynaptic connections shown as steep  
279 or shallow decays in amplitude, respectively, as the pulse duration increases (Fröhlich, 2016).  
280 Once plotted, the rheobase, minimal electrically stimulated current required to elicit an action  
281 potential at an infinite pulse duration, and the chronaxie, an indication of neuronal excitability  
282 defined by the duration of the stimulus corresponding to twice the rheobase, were calculated. 24  
283 h following morphine treatment, we found that the rheobase was not significantly different  
284 compared to control conditions ( $F_{(3,19)} = 0.048$ ,  $p = 0.986$ , one-way ANOVA) (**Fig. 6B**). Similarly,  
285 the chronaxie on D1R- or D2R-MSNs showed no significant change following morphine  
286 treatment ( $F_{(3,19)} = 0.8445$ ,  $p = 0.486$ , one-way ANOVA) (**Fig. 6C**). Overall, these results suggest  
287 that the morphine-induced decreases in synaptic transmission on D2R-MSNs are countered by  
288 increases in intrinsic membrane excitability, which together, enable D2R-MSNs to maintain  
289 basal levels of functional output in response to synaptic input.

## 290 **4. Discussion**

291  
292 Our results show that repeated morphine administration preferentially alters action-potential  
293 independent synaptic transmission and intrinsic membrane excitability on D2R-MSNs, without  
294 affecting D1R-MSNs. Furthermore, our results show that the synaptically-driven action potential  
295 responses on D2R-MSNs, which are expected to integrate both synaptic and intrinsic cellular  
296 properties, remain unchanged following morphine exposure.

### 297 *4.1. Morphine-induced changes in MSN intrinsic membrane excitability*

298 A neuronal homeostatic response refers to a self-correcting property that is necessary in order to  
299 maintain stable function (Huang et al., 2011; Turrigiano, 2011). Here, our results show that 24 h

300 post morphine treatment, the overall synaptic input on D2R-MSNs is reduced (**Figs. 1 and 3**),  
301 while the intrinsic membrane excitability is significantly increased (**Fig. 4**). Given that the  
302 mammalian central nervous system, including the nucleus accumbens, is capable of  
303 compensatory changes in intrinsic membrane excitability to overcome attenuated synaptic  
304 function (Burrone et al., 2002;Maffei and Turrigiano, 2008;Ishikawa et al., 2009), it is possible  
305 that a homeostatic synaptic-to-membrane crosstalk enables D2R-MSNs to maintain sensitivity to  
306 incoming signals, which is supported by our observed non-significant change in functional  
307 output following morphine exposure (**Figs. 5 and 6**).

308 This potential homeostatic response to morphine is in line with observations in the nucleus  
309 accumbens, during short-term abstinence from repeated cocaine administration, whereby NMDA  
310 receptor synaptic expression is increased (Huang et al., 2009), while in parallel, MSN intrinsic  
311 membrane excitability is decreased (Zhang et al., 1998;Dong et al., 2006;Ishikawa et al.,  
312 2009;Kourrich and Thomas, 2009;Mu et al., 2010;Wang et al., 2018). Although, both cocaine  
313 and morphine elicit homeostatic compensatory changes, the contrasting effects on MSN synaptic  
314 transmission and intrinsic membrane excitability is potentially due to the drug's cell-type  
315 specific effects in the accumbens (Huang et al., 2009;Brown et al., 2011;Graziane et al., 2016).

316 Alternatively, homeostasis may not drive the opposing synaptic and intrinsic morphine-induced  
317 changes on D2R-MSNs as these changes may be two independent adaptations. Given that we  
318 observed morphine-induced reductions in both excitatory and inhibitory synaptic transmission on  
319 D2R-MSNs, the overall synaptic transmission may produce no net changes. This is supported by  
320 the sEPSC-to-sIPSC or the sIPSC-to-sEPSC inter-event intervals that show no change following  
321 morphine treatment (Figs. 2D and E). These results suggest that the increases in the intrinsic  
322 membrane excitability would result in an overall excitation gain on D2R-MSNs. Although, an  
323 excitation gain was not observed in our attempt to integrate both the morphine-induced synaptic  
324 and intrinsic properties (Figs. 5 and 6), it is possible that *in vivo* a more complicated scenario  
325 exists. Extensive evidence demonstrates that drugs of abuse influence the firing properties of  
326 neurons in the accumbens (Peoples et al., 1999;Carelli and Ijames, 2000;Ghitza et al.,  
327 2006;Calipari et al., 2016). Given that the bistable membrane potentials of MSNs (e.g., ~-80 mV  
328 down state versus ~-60 mV up state) (O'Donnell and Grace, 1995) are regulated by synaptic  
329 input and intrinsic factors (Plenz and Kitai, 1998;Wickens and Wilson, 1998;Huang et al., 2011),  
330 dysregulations in these factors may influence information flow from MSNs to downstream  
331 targets (O'Donnell et al., 1999), potentially influencing motivated behaviors.

332 Lastly, a previous study has shown that morphine exposure decreases the intrinsic membrane  
333 excitability on MSNs in the nucleus accumbens (NAc) with concomitant increases in the action  
334 potential amplitude, decreases in the action potential half-width, and decreases in the membrane  
335 resistance and tau (Heng et al., 2008). In contrast, following morphine exposure, we observed an  
336 increase in the intrinsic membrane excitability on D2R-MSNs in the NAc shell with no changes  
337 in action potential amplitude or half-width, increases in membrane resistance, and no changes in  
338 tau. These discrepancies may be a result of a number of differences between studies including  
339 the species (rat versus mice), the recording location (unspecific recordings in the NAc versus  
340 NAc shell), the exposure and recording paradigm (7 d morphine with recordings 3-4 d post  
341 treatment versus 5 d morphine with recordings 24 h post treatment), and/or the bath temperature  
342 during recordings (30-32°C versus 22-24°C). Regardless of this discrepancy, a key finding from

343 our studies was the robust morphine-induced increase in intrinsic membrane excitability on D2R-  
344 MSNs, while the intrinsic membrane excitability on D1R-MSNs remained unaltered. These  
345 results demonstrate that morphine exposure produces cell-type specific alterations within the  
346 reward neurocircuit.

#### 347 *4.2. Excitatory-inhibitory balance*

348 The spatiotemporal interaction between excitatory and inhibitory synaptic connections on a  
349 targeted neuron regulates neuronal activity (Wehr and Zador, 2003;Zerlaut and Destexhe,  
350 2017;He and Cline, 2019), modulates neuronal oscillations (Buzsaki and Wang, 2012), and  
351 balances network dynamics (van Vreeswijk and Sompolinsky, 1996;Berke, 2009;Buzsaki and  
352 Watson, 2012;Deneve and Machens, 2016;Bonfond et al., 2017). A problem arises when the  
353 E-I balance is disrupted causing a chronic deviation from the original set-point, which is  
354 associated with pathological states including autism, schizophrenia, epilepsy, and addiction-like  
355 behaviors (Rubenstein and Merzenich, 2003;Eichler and Meier, 2008;Fritschy, 2008;Yizhar et  
356 al., 2011;Tejeda et al., 2017;Yu et al., 2017). Here, we investigated whether morphine abstinence  
357 alters the E/I ratio on D1R- or D2R-MSNs in the accumbens shell by comparing the evoked  
358 excitatory to inhibitory current amplitudes as well as the temporal integration of spontaneous  
359 excitatory and inhibitory events. We show that despite the morphine-induced changes in mEPSC  
360 and mIPSC frequency on D2R-MSNs, the E/I evoked current amplitude ratio and the temporal  
361 relationship between spontaneous excitatory and inhibitory events were unchanged following  
362 morphine administration (**Fig. 2**), potentially due to homeostatic mechanisms that tightly  
363 maintain neuronal E-I balance on D2R-MSNs (Turrigiano and Nelson, 2000;2004;Turrigiano,  
364 2011).

365 We have not examined the mechanisms triggering the potential homeostatic mechanisms that  
366 maintain the E-I balance. However, previously, it has been shown that morphine-induced  
367 decreases in glutamatergic transmission on D2R-MSNs are prevented by administration of the  
368 GluA<sub>2</sub>3Y peptide, which prevents morphine-induced AMPAR removal from excitatory synapses  
369 (Ahmadian et al., 2004;Brebner et al., 2005;Wang, 2008;Graziane et al., 2016;Madayag et al.,  
370 2019). Future studies can investigate the synaptic cascade that potentially leads to the  
371 maintenance of the E-I balance on D2R-MSNs following morphine exposure, by administering  
372 GluA<sub>2</sub>3Y peptide and measuring effects on D2R-MSN mIPSC frequency and intrinsic membrane  
373 excitability. Such work may reveal a homeostatic mechanism triggered by morphine-induced  
374 decreases in glutamatergic synaptic transmission that may also regulate intrinsic membrane  
375 excitability.

376 Lastly, we observed a non-significant change in functional output on D2R-MSNs following  
377 morphine exposure (**Figs. 5 and 6**) despite the increases in intrinsic membrane excitability (**Fig.**  
378 **4**). This result is potentially explained by our synaptic assessments showing an overall decrease  
379 in mEPSC frequency, mIPSC frequency, with no change on the mEPSC or mIPSC amplitude,  
380 E/I ratio, or on the temporal relationship between the E-I balance (**Fig. 2**). These results suggest  
381 that, following morphine exposure, the overall somatic summation of excitatory and inhibitory  
382 currents on D2R-MSNs is potentially weakened. This is likely caused by weakened postsynaptic  
383 excitatory glutamatergic synaptic connections (i.e., decreases in mEPSC frequency (**Fig. 1**) and  
384 increases in the expression of silent synapses (Graziane et al., 2016)) as well as the alterations in  
385 presynaptic factors that result in decreased inhibitory synaptic transmission (i.e., decreases in

386 mIPSC frequency (**Fig. 3**)). These morphine-induced decreases in synaptic transmission on D2R-  
387 MSNs along with the morphine-induced increases in intrinsic membrane excitability, together,  
388 likely enable D2R-MSNs to maintain basal levels of functional output in response to synaptic  
389 input.

#### 390 *4.3. Receptor kinetics*

391 AMPA/kainate receptor kinetics comprise a rapidly rising conductance that decays as the  
392 agonist-receptor complex deactivates (Traynelis et al., 2010). This process is regulated by a  
393 number of factors including receptor subunit composition (Sommer et al., 1990;Partin et al.,  
394 1996;Quirk et al., 2004) and auxiliary regulatory proteins (Milstein et al., 2007;Milstein and  
395 Nicoll, 2008). Here, we show that 24 h post morphine treatment, the AMPA/kainate receptor  
396 kinetics (rise time and decay tau) on D1R- or D2R-MSNs are unchanged (**Fig. 1H and I**). This  
397 result cannot exclude potential alterations in morphine-induced auxiliary protein expression or  
398 receptor subunit composition. It has been shown that mRNAs for AMPA receptor subunits  
399 GluA1, 3, and 4 are significantly decreased in morphine self-administering rats (Hemby, 2004).  
400 However, on average, any morphine-induced changes that may occur, are unable to elicit  
401 changes in overall kinetic properties of AMPA/kainate receptors responding to action potential  
402 independent glutamate release. This suggests that if morphine-induces any potential changes in  
403 EPSC temporal summation at the soma, these alterations are likely not mediated by changes in  
404 AMPA/kainate receptor kinetics. Similarly, we observed no changes in inhibitory ionotropic  
405 neurotransmitter receptor kinetics on D1R- or D2R-MSNs following morphine treatment (**Fig.**  
406 **3H and I**), again suggesting that, overall, if morphine was able to induce changes in receptor  
407 phosphorylation, density, or scaffolding proteins, factors regulating inhibitory ionotropic  
408 receptor kinetics (Verdoorn et al., 1990;Takahashi et al., 1992;Tia et al., 1996;Jones and  
409 Westbrook, 1997;Chen et al., 2000), they are unable to influence the overall kinetic properties of  
410 inhibitory ionotropic receptors responding to action potential independent neurotransmitter  
411 release.

#### 412 *4.4. Sex comparisons*

413 We found that, within all measurements where male and female mice were used (e.g., mEPSC  
414 recordings, mIPSC recordings, E/I ratios, intrinsic membrane excitability, synaptically-driven  
415 action potentials, and rheobase/chronaxie measurements), there were no statistically significant  
416 sex differences within D1R- or D2R-MSNs following non-contingent, repeated saline or  
417 morphine treatment (**Table III**). Because of this, animals were pooled. However, we understand  
418 that our statistical assessment is likely underpowered and therefore, future experiments are  
419 required to directly test sex differences. Additionally, it is possible that bimodal distributions in  
420 our data set are influenced by sex effects. For example, Fig 1G shows a bimodal distribution in  
421 the D1R-MSN cell population following morphine treatment. However, upon further analysis,  
422 these two populations consist of neurons from both males and females suggesting that at the 24 h  
423 abstinence time point following repeated morphine administration, mEPSC frequency on D1R-  
424 MSNs is unaltered. Despite this, it is still worthwhile to perform a thorough assessment of  
425 potential sex effects as it has been shown that, under basal conditions, D2R-MSN mEPSC  
426 frequency is significantly reduced in female versus male prepubertal (2-3 week old) mice, in the  
427 accumbens core (Cao et al., 2018). Determining whether these sex differences are observed into  
428 adulthood following morphine exposure would be an interesting future direction.

#### 429 4.5. Cell type comparisons

430 The nucleus accumbens is a complicated network consisting of D1R and D2R-MSNs that project  
431 to similar brain regions (Smith et al., 2013). Additionally, it has been shown that lateral  
432 inhibition between MSNs exists and this lateral inhibition is critically involved in addiction-like  
433 behaviors (Dobbs et al., 2016). Therefore, imbalances in D1R- and D2R-MSN activity, in  
434 downstream targets, or within the accumbens microcircuit, are potentially responsible for  
435 behavioral phenotypes (e.g., locomotor activity or conditioned place preference) observed  
436 following repeated morphine treatment (Zarrindast et al., 2002; Bohn et al., 2003; Tzschentke,  
437 2007). Using our statistical approach, we found a significant difference in mIPSC amplitude  
438 between D1R-MSN morphine and D2R-MSNs morphine ( $F_{(3,65)}=4.73$ ,  $p=0.005$ ; one way  
439 ANOVA with Bonferroni post-test revealing significant differences between D1R-MSN  
440 morphine and D2R-MSN morphine,  $p=0.0048$ ) (**Fig. 3D**). This result provides a potentially  
441 interesting opportunity to determine whether significant differences in electrophysiological  
442 readouts between neuronal types is sufficient to contribute to drug-induced behavioral  
443 phenotypes. For example, increasing D1R-MSN mIPSC amplitude or decreasing D2R-MSN  
444 mIPSC amplitude in morphine-treated animals may block morphine-induced behavioral  
445 phenotypes as cell-type interactions may drive morphine-induced behaviors. This idea may also  
446 be applied to our observed significant difference in mIPSC frequency between D1R- and D2R-  
447 MSNs in saline-treated animals ( $p=0.024$ , Bonferroni post-test), which was non-significant  
448 following morphine treatment (**Fig. 3G**). Based on these cell-type specific comparisons in  
449 electrophysiological data, it will be interesting to test whether cell-type specific interactions  
450 significantly contribute to addiction-like behaviors.

#### 451 5. Conclusions

452 In conclusion, this study demonstrates new information on how morphine exposure alters both  
453 extrinsic and intrinsic neuronal properties of MSNs in the nucleus accumbens shell. The  
454 alterations observed on D2R-MSNs appear to be opposing in nature, resulting in a maintenance  
455 of basal levels of functional output. It is known that preventing morphine-induced decreases in  
456 glutamatergic transmission on D2R-MSNs blocks the prolonged maintenance (21 d post  
457 conditioning) of morphine-induced CPP (Graziane et al., 2016). Therefore, it is plausible that  
458 morphine-induced alterations on synaptic and intrinsic excitability of D2R-MSNs may not alter  
459 D2R-MSN output during short-term abstinence, but may instead result in an allostatic set point  
460 of excitability that results in long-term behavioral consequences (Koob and Le Moal, 2001).  
461 Although, future studies are required to directly test whether the observed maintenance of D2R-  
462 MSN output drives the prolonged expression of opioid-seeking behaviors.

#### 463 Acknowledgements

464 We thank Dr. Diane McCloskey for edits and comments, and the Silberman lab for their  
465 comments on the project. The study was supported by the NARSAD Young Investigator Award  
466 (27364-NG), the Pennsylvania State Junior Faculty Scholar Award (NG), the Pennsylvania  
467 Department of Health using Tobacco CURE Funds (NG), and the Pennsylvania State Research  
468 Allocation Project Grant (NG). Morphine was provided by the Drug Supply Program of NIDA  
469 NIH.

#### 470 Author Contributions Statement

471 D.S.M. and N.M.G. designed the experiments and analyses, conducted the experiments and data  
472 analyses, and wrote the manuscript. B.J. designed a program for the analysis performed in Fig. 2.

473 **Declaration of Interest**

474 Declarations of interest: none

## 475 **References**

- 476 Ade, K.K., Wan, Y., Chen, M., Gloss, B., and Calakos, N. (2011). An Improved BAC Transgenic  
477 Fluorescent Reporter Line for Sensitive and Specific Identification of Striatonigral  
478 Medium Spiny Neurons. *Front Syst Neurosci* 5, 32.
- 479 Ahmadian, G., Ju, W., Liu, L., Wyszynski, M., Lee, S.H., Dunah, A.W., Taghibiglou, C., Wang,  
480 Y., Lu, J., Wong, T.P., Sheng, M., and Wang, Y.T. (2004). Tyrosine phosphorylation of  
481 GluR2 is required for insulin-stimulated AMPA receptor endocytosis and LTD. *EMBO J*  
482 23, 1040-1050.
- 483 Al-Hasani, R., McCall, J.G., Shin, G., Gomez, A.M., Schmitz, G.P., Bernardi, J.M., Pyo, C.O.,  
484 Park, S.I., Marcinkiewicz, C.M., Crowley, N.A., Krashes, M.J., Lowell, B.B., Kash, T.L.,  
485 Rogers, J.A., and Bruchas, M.R. (2015). Distinct Subpopulations of Nucleus Accumbens  
486 Dynorphin Neurons Drive Aversion and Reward. *Neuron* 87, 1063-1077.
- 487 Berke, J.D. (2009). Fast oscillations in cortical-striatal networks switch frequency following  
488 rewarding events and stimulant drugs. *Eur J Neurosci* 30, 848-859.
- 489 Bertran-Gonzalez, J., Bosch, C., Maroteaux, M., Matamales, M., Herve, D., Valjent, E., and  
490 Girault, J.A. (2008). Opposing patterns of signaling activation in dopamine D1 and D2  
491 receptor-expressing striatal neurons in response to cocaine and haloperidol. *J Neurosci*  
492 28, 5671-5685.
- 493 Bhatia, A., Moza, S., and Bhalla, U.S. (2019). Precise excitation-inhibition balance controls gain  
494 and timing in the hippocampus. *Elife* 8.
- 495 Bohn, L.M., Gainetdinov, R.R., Sotnikova, T.D., Medvedev, I.O., Lefkowitz, R.J., Dykstra, L.A.,  
496 and Caron, M.G. (2003). Enhanced rewarding properties of morphine, but not cocaine, in  
497 beta(arrestin)-2 knock-out mice. *J Neurosci* 23, 10265-10273.
- 498 Bonnefond, M., Kastner, S., and Jensen, O. (2017). Communication between Brain Areas  
499 Based on Nested Oscillations. *eNeuro* 4.
- 500 Brebner, K., Wong, T.P., Liu, L., Liu, Y., Campsall, P., Gray, S., Phelps, L., Phillips, A.G., and  
501 Wang, Y.T. (2005). Nucleus accumbens long-term depression and the expression of  
502 behavioral sensitization. *Science* 310, 1340-1343.
- 503 Brown, T.E., Lee, B.R., Mu, P., Ferguson, D., Dietz, D., Ohnishi, Y.N., Lin, Y., Suska, A.,  
504 Ishikawa, M., and Huang, Y.H. (2011). A silent synapse-based mechanism for cocaine-  
505 induced locomotor sensitization. *Journal of Neuroscience* 31, 8163-8174.
- 506 Burrone, J., O'byrne, M., and Murthy, V.N. (2002). Multiple forms of synaptic plasticity triggered  
507 by selective suppression of activity in individual neurons. *Nature* 420, 414-418.
- 508 Buzsaki, G., and Wang, X.J. (2012). Mechanisms of gamma oscillations. *Annu Rev Neurosci*  
509 35, 203-225.
- 510 Buzsaki, G., and Watson, B.O. (2012). Brain rhythms and neural syntax: implications for  
511 efficient coding of cognitive content and neuropsychiatric disease. *Dialogues Clin*  
512 *Neurosci* 14, 345-367.
- 513 Calipari, E.S., Bagot, R.C., Purushothaman, I., Davidson, T.J., Yorgason, J.T., Pena, C.J.,  
514 Walker, D.M., Pirpinias, S.T., Guise, K.G., Ramakrishnan, C., Deisseroth, K., and  
515 Nestler, E.J. (2016). In vivo imaging identifies temporal signature of D1 and D2 medium  
516 spiny neurons in cocaine reward. *Proc Natl Acad Sci U S A* 113, 2726-2731.
- 517 Cao, J., Dorris, D.M., and Meitzen, J. (2018). Electrophysiological properties of medium spiny  
518 neurons in the nucleus accumbens core of prepubertal male and female *Drd1a*-  
519 *tdTomato* line 6 BAC transgenic mice. *J Neurophysiol* 120, 1712-1727.
- 520 Carelli, R.M., and Ijames, S.G. (2000). Nucleus accumbens cell firing during maintenance,  
521 extinction, and reinstatement of cocaine self-administration behavior in rats. *Brain Res*  
522 866, 44-54.

- 523 Castro, D.C., and Bruchas, M.R. (2019). A Motivational and Neuropeptidergic Hub: Anatomical  
524 and Functional Diversity within the Nucleus Accumbens Shell. *Neuron* 102, 529-552.
- 525 Chen, L., Wang, H., Vicini, S., and Olsen, R.W. (2000). The gamma-aminobutyric acid type A  
526 (GABAA) receptor-associated protein (GABARAP) promotes GABAA receptor clustering  
527 and modulates the channel kinetics. *Proc Natl Acad Sci U S A* 97, 11557-11562.
- 528 Creed, M., Ntamati, N.R., Chandra, R., Lobo, M.K., and Luscher, C. (2016). Convergence of  
529 Reinforcing and Anhedonic Cocaine Effects in the Ventral Pallidum. *Neuron* 92, 214-  
530 226.
- 531 Deneve, S., and Machens, C.K. (2016). Efficient codes and balanced networks. *Nat Neurosci*  
532 19, 375-382.
- 533 Desai, N.S., Rutherford, L.C., and Turrigiano, G.G. (1999). Plasticity in the intrinsic excitability of  
534 cortical pyramidal neurons. *Nat Neurosci* 2, 515-520.
- 535 Dobbs, L.K., Kaplan, A.R., Lemos, J.C., Matsui, A., Rubinstein, M., and Alvarez, V.A. (2016).  
536 Dopamine Regulation of Lateral Inhibition between Striatal Neurons Gates the Stimulant  
537 Actions of Cocaine. *Neuron* 90, 1100-1113.
- 538 Dong, Y., Green, T., Saal, D., Marie, H., Neve, R., Nestler, E.J., and Malenka, R.C. (2006).  
539 CREB modulates excitability of nucleus accumbens neurons. *Nat Neurosci* 9, 475-477.
- 540 Eichler, S.A., and Meier, J.C. (2008). E-I balance and human diseases - from molecules to  
541 networking. *Front Mol Neurosci* 1, 2.
- 542 Enoksson, T., Bertran-Gonzalez, J., and Christie, M.J. (2012). Nucleus accumbens D2- and D1-  
543 receptor expressing medium spiny neurons are selectively activated by morphine  
544 withdrawal and acute morphine, respectively. *Neuropharmacology* 62, 2463-2471.
- 545 Figl, T., Lewis, T., and Barry, P. 2003. Liquid junction potential corrections. *AxoBits* [Online], 39.
- 546 Fritschy, J.M. (2008). Epilepsy, E/I Balance and GABA(A) Receptor Plasticity. *Front Mol*  
547 *Neurosci* 1, 5.
- 548 Fröhlich, F. (2016). "Chapter 14 - Deep Brain Stimulation," in *Network Neuroscience*, ed. F.  
549 Fröhlich. (San Diego: Academic Press), 187-196.
- 550 Ghitza, U.E., Prokopenko, V.F., West, M.O., and Fabbriatore, A.T. (2006). Higher magnitude  
551 accumbal phasic firing changes among core neurons exhibiting tonic firing increases  
552 during cocaine self-administration. *Neuroscience* 137, 1075-1085.
- 553 Graziane, N.M., Sun, S., Wright, W.J., Jang, D., Liu, Z., Huang, Y.H., Nestler, E.J., Wang, Y.T.,  
554 Schluter, O.M., and Dong, Y. (2016). Opposing mechanisms mediate morphine- and  
555 cocaine-induced generation of silent synapses. *Nat Neurosci* 19, 915-925.
- 556 Hanse, E., Seth, H., and Riebe, I. (2013). AMPA-silent synapses in brain development and  
557 pathology. *Nat Rev Neurosci* 14, 839-850.
- 558 He, H.Y., and Cline, H.T. (2019). What Is Excitation/Inhibition and How Is It Regulated? A Case  
559 of the Elephant and the Wisemen. *J Exp Neurosci* 13, 1179069519859371.
- 560 He, H.Y., Shen, W., Zheng, L., Guo, X., and Cline, H.T. (2018). Excitatory synaptic dysfunction  
561 cell-autonomously decreases inhibitory inputs and disrupts structural and functional  
562 plasticity. *Nat Commun* 9, 2893.
- 563 Hearing, M., Graziane, N., Dong, Y., and Thomas, M.J. (2018). Opioid and Psychostimulant  
564 Plasticity: Targeting Overlap in Nucleus Accumbens Glutamate Signaling. *Trends*  
565 *Pharmacol Sci* 39, 276-294.
- 566 Hearing, M.C., Jedynak, J., Ebner, S.R., Ingebretson, A., Asp, A.J., Fischer, R.A., Schmidt, C.,  
567 Larson, E.B., and Thomas, M.J. (2016). Reversal of morphine-induced cell-type-specific  
568 synaptic plasticity in the nucleus accumbens shell blocks reinstatement. *Proc Natl Acad*  
569 *Sci U S A* 113, 757-762.
- 570 Heinsbroek, J.A., Neuhofer, D.N., Griffin, W.C., Siegel, G.S., Bobadilla, A.-C., Kupchik, Y.M.,  
571 and Kalivas, P.W. (2017). Loss of Plasticity in the D2-Accumbens Pallidal Pathway  
572 Promotes Cocaine Seeking. *The Journal of Neuroscience* 37, 757-767.



- 573 Hemby, S.E. (2004). Morphine-induced alterations in gene expression of calbindin  
574 immunopositive neurons in nucleus accumbens shell and core. *Neuroscience* 126, 689-  
575 703.
- 576 Heng, L.J., Yang, J., Liu, Y.H., Wang, W.T., Hu, S.J., and Gao, G.D. (2008). Repeated  
577 morphine exposure decreased the nucleus accumbens excitability during short-term  
578 withdrawal. *Synapse* 62, 775-782.
- 579 Higley, M.J., and Contreras, D. (2006). Balanced excitation and inhibition determine spike timing  
580 during frequency adaptation. *J Neurosci* 26, 448-457.
- 581 Hikida, T., Kimura, K., Wada, N., Funabiki, K., and Nakanishi, S. (2010). Distinct roles of  
582 synaptic transmission in direct and indirect striatal pathways to reward and aversive  
583 behavior. *Neuron* 66, 896-907.
- 584 Hiratani, N., and Fukai, T. (2017). Detailed Dendritic Excitatory/Inhibitory Balance through  
585 Heterosynaptic Spike-Timing-Dependent Plasticity. *J Neurosci* 37, 12106-12122.
- 586 Hopf, F.W., Cascini, M.G., Gordon, A.S., Diamond, I., and Bonci, A. (2003). Cooperative  
587 activation of dopamine D1 and D2 receptors increases spike firing of nucleus  
588 accumbens neurons via G-protein betagamma subunits. *J Neurosci* 23, 5079-5087.
- 589 Huang, Y.H., Lin, Y., Mu, P., Lee, B.R., Brown, T.E., Wayman, G., Marie, H., Liu, W., Yan, Z.,  
590 Sorg, B.A., Schluter, O.M., Zukin, R.S., and Dong, Y. (2009). In vivo cocaine experience  
591 generates silent synapses. *Neuron* 63, 40-47.
- 592 Huang, Y.H., Schluter, O.M., and Dong, Y. (2011). Cocaine-induced homeostatic regulation and  
593 dysregulation of nucleus accumbens neurons. *Behav Brain Res* 216, 9-18.
- 594 Ishikawa, M., Mu, P., Moyer, J.T., Wolf, J.A., Quock, R.M., Davies, N.M., Hu, X.T., Schluter,  
595 O.M., and Dong, Y. (2009). Homeostatic synapse-driven membrane plasticity in nucleus  
596 accumbens neurons. *J Neurosci* 29, 5820-5831.
- 597 Jones, M.V., and Westbrook, G.L. (1997). Shaping of IPSCs by endogenous calcineurin activity.  
598 *J Neurosci* 17, 7626-7633.
- 599 Kerchner, G.A., and Nicoll, R.A. (2008). Silent synapses and the emergence of a postsynaptic  
600 mechanism for LTP. *Nat Rev Neurosci* 9, 813-825.
- 601 Koo, J.W., Lobo, M.K., Chaudhury, D., Labonte, B., Friedman, A., Heller, E., Pena, C.J., Han,  
602 M.H., and Nestler, E.J. (2014). Loss of BDNF signaling in D1R-expressing NAc neurons  
603 enhances morphine reward by reducing GABA inhibition. *Neuropsychopharmacology* 39,  
604 2646-2653.
- 605 Koob, G.F., and Le Moal, M. (2001). Drug addiction, dysregulation of reward, and allostasis.  
606 *Neuropsychopharmacology* 24, 97-129.
- 607 Kourrich, S., Calu, D.J., and Bonci, A. (2015). Intrinsic plasticity: an emerging player in  
608 addiction. *Nat Rev Neurosci* 16, 173-184.
- 609 Kourrich, S., and Thomas, M.J. (2009). Similar neurons, opposite adaptations: psychostimulant  
610 experience differentially alters firing properties in accumbens core versus shell. *J*  
611 *Neurosci* 29, 12275-12283.
- 612 Lalchandani, R.R., Van Der Goes, M.-S., Partridge, J.G., and Vicini, S. (2013). Dopamine D<sub>2</sub>  
613 Receptors Regulate Collateral Inhibition between Striatal Medium Spiny Neurons. *The*  
614 *Journal of Neuroscience* 33, 14075-14086.
- 615 Lee, B.R., Ma, Y.Y., Huang, Y.H., Wang, X., Otaka, M., Ishikawa, M., Neumann, P.A., Graziane,  
616 N.M., Brown, T.E., Suska, A., Guo, C., Lobo, M.K., Sesack, S.R., Wolf, M.E., Nestler,  
617 E.J., Shaham, Y., Schluter, O.M., and Dong, Y. (2013). Maturation of silent synapses in  
618 amygdala-accumbens projection contributes to incubation of cocaine craving. *Nat*  
619 *Neurosci* 16, 1644-1651.
- 620 Liu, Z., Wang, Y., Cai, L., Li, Y., Chen, B., Dong, Y., and Huang, Y.H. (2016). Prefrontal Cortex  
621 to Accumbens Projections in Sleep Regulation of Reward. *J Neurosci* 36, 7897-7910.

- 622 Lobo, M.K., Covington, H.E., 3rd, Chaudhury, D., Friedman, A.K., Sun, H., Damez-Werno, D.,  
623 Dietz, D.M., Zaman, S., Koo, J.W., Kennedy, P.J., Mouzon, E., Mogri, M., Neve, R.L.,  
624 Deisseroth, K., Han, M.H., and Nestler, E.J. (2010). Cell type-specific loss of BDNF  
625 signaling mimics optogenetic control of cocaine reward. *Science* 330, 385-390.
- 626 Madayag, A.C., Gomez, D., Anderson, E.M., Ingebretson, A.E., Thomas, M.J., and Hearing,  
627 M.C. (2019). Cell-type and region-specific nucleus accumbens AMPAR plasticity  
628 associated with morphine reward, reinstatement, and spontaneous withdrawal. *Brain*  
629 *Struct Funct.*
- 630 Maffei, A., and Turrigiano, G.G. (2008). Multiple modes of network homeostasis in visual cortical  
631 layer 2/3. *J Neurosci* 28, 4377-4384.
- 632 Mcdevitt, D.S., and Graziane, N.M. (2018). Neuronal mechanisms mediating pathological  
633 reward-related behaviors: A focus on silent synapses in the nucleus accumbens.  
634 *Pharmacol Res* 136, 90-96.
- 635 Milstein, A.D., and Nicoll, R.A. (2008). Regulation of AMPA receptor gating and pharmacology  
636 by TARP auxiliary subunits. *Trends in Pharmacological Sciences* 29, 333-339.
- 637 Milstein, A.D., Zhou, W., Karimzadegan, S., Brecht, D.S., and Nicoll, R.A. (2007). TARP  
638 Subtypes Differentially and Dose-Dependently Control Synaptic AMPA Receptor Gating.  
639 *Neuron* 55, 905-918.
- 640 Mu, P., Moyer, J.T., Ishikawa, M., Zhang, Y., Panksepp, J., Sorg, B.A., Schluter, O.M., and  
641 Dong, Y. (2010). Exposure to cocaine dynamically regulates the intrinsic membrane  
642 excitability of nucleus accumbens neurons. *J Neurosci* 30, 3689-3699.
- 643 Nelson, A.B., Krispel, C.M., Sekirnjak, C., and Du Lac, S. (2003). Long-lasting increases in  
644 intrinsic excitability triggered by inhibition. *Neuron* 40, 609-620.
- 645 O'donnell, P., and Grace, A.A. (1995). Synaptic interactions among excitatory afferents to  
646 nucleus accumbens neurons: hippocampal gating of prefrontal cortical input. *J Neurosci*  
647 15, 3622-3639.
- 648 O'donnell, P., Greene, J., Pabello, N., Lewis, B.L., and Grace, A.A. (1999). Modulation of cell  
649 firing in the nucleus accumbens. *Ann N Y Acad Sci* 877, 157-175.
- 650 Okun, M., and Lampl, I. (2008). Instantaneous correlation of excitation and inhibition during  
651 ongoing and sensory-evoked activities. *Nature Neuroscience* 11, 535.
- 652 Otaka, M., Ishikawa, M., Lee, B.R., Liu, L., Neumann, P.A., Cui, R., Huang, Y.H., Schluter,  
653 O.M., and Dong, Y. (2013). Exposure to cocaine regulates inhibitory synaptic  
654 transmission in the nucleus accumbens. *J Neurosci* 33, 6753-6758.
- 655 Partin, K.M., Fleck, M.W., and Mayer, M.L. (1996). AMPA Receptor Flip/Flop Mutants Affecting  
656 Deactivation, Desensitization, and Modulation by Cyclothiazide, Aniracetam, and  
657 Thiocyanate. *The Journal of Neuroscience* 16, 6634-6647.
- 658 Paxinos, G., and Franklin, K.B.J. (2004). *The Mouse Brain in Stereotaxic Coordinates*. Elsevier  
659 Academic Press.
- 660 Peoples, L.L., Uzwiak, A.J., Gee, F., and West, M.O. (1999). Tonic firing of rat nucleus  
661 accumbens neurons: changes during the first 2 weeks of daily cocaine self-  
662 administration sessions. *Brain Res* 822, 231-236.
- 663 Pernia-Andrade, A.J., Goswami, S.P., Stickler, Y., Frobe, U., Schlogl, A., and Jonas, P. (2012).  
664 A deconvolution-based method with high sensitivity and temporal resolution for detection  
665 of spontaneous synaptic currents in vitro and in vivo. *Biophys J* 103, 1429-1439.
- 666 Plenz, D., and Kitai, S.T. (1998). Up and down states in striatal medium spiny neurons  
667 simultaneously recorded with spontaneous activity in fast-spiking interneurons studied in  
668 cortex-striatum-substantia nigra organotypic cultures. *J Neurosci* 18, 266-283.
- 669 Quirk, J.C., Siuda, E.R., and Nisenbaum, E.S. (2004). Molecular determinants responsible for  
670 differences in desensitization kinetics of AMPA receptor splice variants. *J Neurosci* 24,  
671 11416-11420.

- 672 Roland, P.E., Bonde, L.H., Forsberg, L.E., and Harvey, M.A. (2017). Breaking the Excitation-  
673 Inhibition Balance Makes the Cortical Network's Space-Time Dynamics Distinguish  
674 Simple Visual Scenes. *Frontiers in Systems Neuroscience* 11.
- 675 Rubenstein, J.L., and Merzenich, M.M. (2003). Model of autism: increased ratio of  
676 excitation/inhibition in key neural systems. *Genes Brain Behav* 2, 255-267.
- 677 Russo, S.J., Dietz, D.M., Dumitriu, D., Morrison, J.H., Malenka, R.C., and Nestler, E.J. (2010).  
678 The addicted synapse: mechanisms of synaptic and structural plasticity in nucleus  
679 accumbens. *Trends in Neurosciences* 33, 267-276.
- 680 Salgado, S., and Kaplitt, M.G. (2015). The Nucleus Accumbens: A Comprehensive Review.  
681 *Stereotactic and Functional Neurosurgery* 93, 75-93.
- 682 Scofield, M., Heinsbroek, J., Gipson, C., Kupchik, Y., Spencer, S., Smith, A., Roberts-Wolfe, D.,  
683 and Kalivas, P. (2016). The nucleus accumbens: mechanisms of addiction across drug  
684 classes reflect the importance of glutamate homeostasis. *Pharmacological reviews* 68,  
685 816-871.
- 686 Sesack, S.R., and Grace, A.A. (2010). Cortico-Basal Ganglia reward network: microcircuitry.  
687 *Neuropsychopharmacology* 35, 27-47.
- 688 Smith, R.J., Lobo, M.K., Spencer, S., and Kalivas, P.W. (2013). Cocaine-induced adaptations in  
689 D1 and D2 accumbens projection neurons (a dichotomy not necessarily synonymous  
690 with direct and indirect pathways). *Curr Opin Neurobiol* 23, 546-552.
- 691 Sommer, B., Keinanen, K., Verdoorn, T.A., Wisden, W., Burnashev, N., Herb, A., Kohler, M.,  
692 Takagi, T., Sakmann, B., and Seeburg, P.H. (1990). Flip and flop: a cell-specific  
693 functional switch in glutamate-operated channels of the CNS. *Science* 249, 1580-1585.
- 694 Takahashi, T., Momiyama, A., Hirai, K., Hishinuma, F., and Akagi, H. (1992). Functional  
695 correlation of fetal and adult forms of glycine receptors with developmental changes in  
696 inhibitory synaptic receptor channels. *Neuron* 9, 1155-1161.
- 697 Tejada, H.A., Wu, J., Kornspun, A.R., Pignatelli, M., Kashtelyan, V., Krashes, M.J., Lowell, B.B.,  
698 Carlezon, W.A., Jr., and Bonci, A. (2017). Pathway- and Cell-Specific Kappa-Opioid  
699 Receptor Modulation of Excitation-Inhibition Balance Differentially Gates D1 and D2  
700 Accumbens Neuron Activity. *Neuron* 93, 147-163.
- 701 Thibault, D., Loustalot, F., Fortin, G.M., Bourque, M.-J., and Trudeau, L.-É. (2013). Evaluation of  
702 D1 and D2 dopamine receptor segregation in the developing striatum using BAC  
703 transgenic mice. *PloS one* 8, e67219-e67219.
- 704 Tia, S., Wang, J.F., Kotchabhakdi, N., and Vicini, S. (1996). Distinct deactivation and  
705 desensitization kinetics of recombinant GABAA receptors. *Neuropharmacology* 35,  
706 1375-1382.
- 707 Traynelis, S.F., Wollmuth, L.P., McBain, C.J., Menniti, F.S., Vance, K.M., Ogden, K.K., Hansen,  
708 K.B., Yuan, H., Myers, S.J., and Dingledine, R. (2010). Glutamate receptor ion channels:  
709 structure, regulation, and function. *Pharmacol Rev* 62, 405-496.
- 710 Turrigiano, G. (2011). Too many cooks? Intrinsic and synaptic homeostatic mechanisms in  
711 cortical circuit refinement. *Annu Rev Neurosci* 34, 89-103.
- 712 Turrigiano, G.G., and Nelson, S.B. (2000). Hebb and homeostasis in neuronal plasticity. *Curr*  
713 *Opin Neurobiol* 10, 358-364.
- 714 Turrigiano, G.G., and Nelson, S.B. (2004). Homeostatic plasticity in the developing nervous  
715 system. *Nat Rev Neurosci* 5, 97-107.
- 716 Tzschentke, T.M. (2007). Measuring reward with the conditioned place preference (CPP)  
717 paradigm: update of the last decade. *Addict Biol* 12, 227-462.
- 718 Van Vreeswijk, C., and Sompolinsky, H. (1996). Chaos in neuronal networks with balanced  
719 excitatory and inhibitory activity. *Science* 274, 1724-1726.
- 720 Verdoorn, T.A., Draguhn, A., Ymer, S., Seeburg, P.H., and Sakmann, B. (1990). Functional  
721 properties of recombinant rat GABAA receptors depend upon subunit composition.  
722 *Neuron* 4, 919-928.

- 723 Wang, J., Ishikawa, M., Yang, Y., Otaka, M., Kim, J.Y., Gardner, G.R., Stefanik, M.T.,  
724 Milovanovic, M., Huang, Y.H., Hell, J.W., Wolf, M.E., Schluter, O.M., and Dong, Y.  
725 (2018). Cascades of Homeostatic Dysregulation Promote Incubation of Cocaine Craving.  
726 *J Neurosci*.
- 727 Wang, Y.T. (2008). Probing the role of AMPAR endocytosis and long-term depression in  
728 behavioural sensitization: relevance to treatment of brain disorders, including drug  
729 addiction. *Br J Pharmacol* 153 Suppl 1, S389-395.
- 730 Wehr, M., and Zador, A.M. (2003). Balanced inhibition underlies tuning and sharpens spike  
731 timing in auditory cortex. *Nature* 426, 442-446.
- 732 Wickens, J.R., and Wilson, C.J. (1998). Regulation of action-potential firing in spiny neurons of  
733 the rat neostriatum in vivo. *J Neurophysiol* 79, 2358-2364.
- 734 Willett, J.A., Cao, J., Dorris, D.M., Johnson, A.G., Ginnari, L.A., and Meitzen, J. (2019).  
735 Electrophysiological Properties of Medium Spiny Neuron Subtypes in the Caudate-  
736 Putamen of Prepubertal Male and Female *Drd1a*-tdTomato Line 6 BAC  
737 Transgenic Mice. *eneuro* 6, ENEURO.0016-0019.2019.
- 738 Wolf, J.A., Moyer, J.T., Lazarewicz, M.T., Contreras, D., Benoit-Marand, M., O'donnell, P., and  
739 Finkel, L.H. (2005). NMDA/AMPA Ratio Impacts State Transitions and Entrainment to  
740 Oscillations in a Computational Model of the Nucleus Accumbens Medium Spiny  
741 Projection Neuron. *The Journal of Neuroscience* 25, 9080-9095.
- 742 Wolf, M.E. (2010). The Bermuda Triangle of cocaine-induced neuroadaptations. *Trends*  
743 *Neurosci* 33, 391-398.
- 744 Yizhar, O., Fenno, L.E., Prigge, M., Schneider, F., Davidson, T.J., O'shea, D.J., Sohal, V.S.,  
745 Goshen, I., Finkelstein, J., Paz, J.T., Stehfest, K., Fudim, R., Ramakrishnan, C.,  
746 Huguenard, J.R., Hegemann, P., and Deisseroth, K. (2011). Neocortical  
747 excitation/inhibition balance in information processing and social dysfunction. *Nature*  
748 477, 171-178.
- 749 Yu, J., Yan, Y., Li, K.L., Wang, Y., Huang, Y.H., Urban, N.N., Nestler, E.J., Schluter, O.M., and  
750 Dong, Y. (2017). Nucleus accumbens feedforward inhibition circuit promotes cocaine  
751 self-administration. *Proc Natl Acad Sci U S A* 114, E8750-E8759.
- 752 Zarrindast, M.-R., Bahreini, T., and Adl, M. (2002). Effect of imipramine on the expression and  
753 acquisition of morphine-induced conditioned place preference in mice. *Pharmacology*  
754 *Biochemistry and Behavior* 73, 941-949.
- 755 Zerlaut, Y., and Destexhe, A. (2017). Enhanced Responsiveness and Low-Level Awareness in  
756 Stochastic Network States. *Neuron* 94, 1002-1009.
- 757 Zhang, W., and Linden, D.J. (2003). The other side of the engram: experience-driven changes  
758 in neuronal intrinsic excitability. *Nat Rev Neurosci* 4, 885-900.
- 759 Zhang, X.F., Hu, X.T., and White, F.J. (1998). Whole-cell plasticity in cocaine withdrawal:  
760 reduced sodium currents in nucleus accumbens neurons. *J Neurosci* 18, 488-498.
- 761 Zhou, F.W., Chen, H.X., and Roper, S.N. (2009). Balance of inhibitory and excitatory synaptic  
762 activity is altered in fast-spiking interneurons in experimental cortical dysplasia. *J*  
763 *Neurophysiol* 102, 2514-2525.

764 **Figure Legends**

765

766 **Figure 1.** Repeated morphine administration reduces mEPSC frequency on D2R-MSNs on  
767 abstinence day 1. (A) Representative traces showing mEPSCs recorded from D1R- or D2R-  
768 MSNs from animals treated with saline or morphine (10 mg/kg, i.p.). Scale bar: 20 pA, 1s. (B  
769 and C) Cumulative plot of a representative neuron showing the distribution of mEPSC  
770 amplitudes recorded from D1R-MSNs (B) or D2R-MSNs (C) in animals treated with saline or  
771 morphine. (D) Summary graph showing the average mEPSC amplitude recorded D1R- or D2R-  
772 MSNs following saline or morphine treatment ( $F_{(3,42)}=2.92$ ,  $p=0.045$ ; One-way ANOVA.  
773 Bonferroni post-test, D1R-MSN: saline versus morphine,  $p>0.999$ ; D2R-MSN: saline versus  
774 morphine,  $p>0.999$ ). (E and F) Cumulative plot of a representative neuron showing the  
775 distribution of mEPSC inter-event intervals (I-I) recorded from D1R-MSNs (E) or D2R-MSNs  
776 (F) in animals treated with saline or morphine. (G) Summary graph showing the average mEPSC  
777 frequency recorded from D1R- or D2R-MSNs following saline or morphine treatment  
778 ( $F_{(3,42)}=6.73$ ,  $p=0.0008$ ; One-way ANOVA with Bonferroni post-test; \* $p<0.05$ , \*\* $p<0.01$ ). (H)  
779 Summary graph showing the average rise time of mEPSC recorded from D1R- or D2R-MSNs  
780 following saline or morphine treatment. (I) Summary graph showing the average decay tau of  
781 mEPSC recorded from D1R- or D2R-MSNs following saline or morphine treatment.  
782 Circle=neuron.

783

784 **Figure 2.** Short-term abstinence from *in vivo* morphine treatment has no effect on the evoked  
785 excitatory/inhibitory (E/I) ratio and does not alter the temporal relationship between spontaneous  
786 EPSCs (sEPSCs) and IPSCs (sIPSCs) on D1R- or D2R-MSNs in the nucleus accumbens shell.  
787 (A) Representative traces showing evoked AMPA receptor (AMPA)- and GABA receptor  
788 (GABAR)-mediated currents on D1R- or D2R-MSNs 24 h following repeated saline or morphine  
789 treatments. Neurons were held at -70 mV. (B) Summary graph showing the E/I ratio of evoked  
790 currents on D1R- or D2R-MSNs 24 h following repeated saline (sal) or morphine (mor) (10  
791 mg/kg, i.p.) treatments. There were no significant differences between groups in male or female  
792 mice. (C) Representative traces showing spontaneous EPSCs (inward current) and IPSCs  
793 (outward current) when D1R- or D2R MSNs were held at -30 mV 24 h following *in vivo*  
794 morphine treatment. Scale bars: 20 pA, 0.5 s (Lower). Electrophysiological recordings in whole-  
795 cell patch clamp configuration showing the inter-event intervals (inter. interv.) of sEPSCs to  
796 sIPSCs (left) or sIPSCs to sEPSCs (right) in a MSN held at -30 mV. Scale bars: 20 pA, 0.125 s  
797 (D) Summary graph showing no significant changes in the inter-event interval (I-I) between  
798 sEPSCs and sIPSCs on D1R- or D2R-MSNs 24 following repeated saline or morphine  
799 administration in male mice. (E) Summary graph showing no significant changes in the inter-  
800 event interval (I-I) between sIPSCs and sEPSCs on D1R- or D2R-MSNs 24 following repeated  
801 saline or morphine administration in male mice. (F) Summary graph showing that morphine  
802 exposure had no effect on the frequency ratio of sEPSC to sIPSC events within D1R- or D2R-  
803 MSNs in male mice.

804

805 **Figure 3.** Repeated morphine administration reduces mIPSC frequency on D2R-MSNs on  
806 abstinence day 1. (A) Representative traces showing mIPSCs recorded from D1R- or D2R-  
807 MSNs from animals treated with saline or morphine (10 mg/kg, i.p.). Scale bar: 25 pA, 0.5 s. (B  
808 and C) Cumulative plot showing the distribution of mIPSC amplitudes recorded from D1R-  
809 MSNs (B) or D2R-MSNs (C) in animals treated with saline or morphine. (D) Summary graph

810 showing the average mIPSC amplitude recorded D1R- or D2R-MSNs following saline or  
811 morphine treatment ( $F_{(3,65)}=4.73$ ,  $p=0.005$ ; one way ANOVA with Bonferroni post-test).  
812 \* $p<0.05$ . (E and F) Cumulative plot of a representative neuron showing the distribution of  
813 mIPSC inter-event intervals (I-I) recorded from D1R-MSNs (E) or D2R-MSNs (F) in animals  
814 treated with saline or morphine. (G) Summary graph showing the average mIPSC frequency  
815 recorded from D1R- or D2R-MSNs following saline or morphine treatment ( $F_{(3,65)}=8.94$ ,  
816  $p<0.0001$ ; one-way ANOVA with Bonferroni post-test; \* $p<0.05$ , \*\* $p<0.01$ ). (H) Summary graph  
817 showing the average rise time of mIPSC recorded from D1R- or D2R-MSNs following saline or  
818 morphine treatment. (I) Summary graph showing the average decay tau of mIPSC recorded from  
819 D1R- or D2R-MSNs following saline or morphine treatment. Circle=neuron.

820

821 **Figure 4.** Repeated morphine administration increases membrane excitability on D2R-MSNs on  
822 abstinence day 1. (A) Representative traces, scale bar, 40 mV, 300 ms at 100 pA current  
823 injection. (B) Summary graph showing the average number spikes generated by injected current  
824 on D1R-MSNs following saline or morphine (10 mg/kg, i.p.) treatment ( $F_{(7,238)}=1.05$ ,  $p=0.395$ ;  
825 two-way repeated measures ANOVA). (C) Summary graph showing the average number spikes  
826 generated by injected current on D2R-MSNs following saline or morphine treatment  
827 ( $F_{(7,210)}=10.4$ ,  $p=0<0.0001$ ; two-way repeated measures ANOVA with Bonferroni post-test).  
828 \* $p<0.05$ . (n/n=cells/animals).

829

830 **Figure 5.** Synaptically-driven action potential firing on D1R- or D2R-MSNs is unaffected by  
831 repeated morphine (10 mg/kg, i.p.) treatment. (A) Representative traces showing depolarizations  
832 or action potentials of a recorded MSN evoked by electrical current (in  $\mu\text{A}$ ) of 20 (light gray), 60  
833 (blue), 100 (black), or 100 in the presence of NBQX (red), an AMPA receptor antagonist. Scale  
834 bars, 12.5 mV, 50 ms. (B and C) Summary graphs showing the average spike number at each  
835 current injected for D1R- or D2R-MSNs following saline or morphine treatment (cells/animals).

836

837 **Figure 6.** A strength-duration curve constructed from an MSN in the nucleus accumbens shell.  
838 Stimulus current was adjusted at each duration (from 0-2.0 ms with 0.2 ms increments) until an  
839 action potential was evoked using an electrical stimulus. The curve was fit with a two-phase  
840 exponential decay. The rheobase (gray dashed line) was calculated as the plateau of the curve  
841 and the chronaxie (black dashed line) was calculated as 2x the rheobase. (Inset) Representative  
842 traces illustrating the stimulus (downward deflection) followed by the action potential at 2 ms  
843 duration). In the presence of NBQX (2  $\mu\text{M}$ ), action potentials are not elicited (2 ms duration, 35  
844  $\mu\text{A}$  of current). Scale bars, 20 mV, 12.5 ms. (B) Summary graph showing the average rheobase  
845 for D1R- or D2R-MSNs following saline (Sal) or morphine (Mor) (10 mg/kg, i.p.) treatment. (C)  
846 Summary graph showing the average chronaxie for D1R- or D2R-MSNs following saline or  
847 morphine treatment.

**Table I. Cell Properties from electrophysiological assessments.**

|                                  | <b>Saline</b>      |                     | <b>Morphine</b>     |                    |
|----------------------------------|--------------------|---------------------|---------------------|--------------------|
|                                  | D1R-MSN            | D2R-MSN             | D1R-MSN             | D2R-MSN            |
| <b>Membrane Capacitance (pF)</b> | 81.11±2.11<br>(71) | 75.83±2.56<br>(64)  | 82.01±2.48<br>(72)  | 76.93±1.89<br>(78) |
| <b>Membrane Resistance (MΩ)</b>  | 250.5±9.09<br>(71) | 256.1±12.34<br>(64) | 246.6±11.88<br>(72) | 280.3±10.8<br>(78) |
| <b>Tau (ms)</b>                  | 1.53±0.07<br>(21)  | 1.42±0.09<br>(16)   | 1.49±0.08<br>(21)   | 1.49±0.12<br>(16)  |

Number of cells (n). Tau values provided by Axon software. They were unavailable in Sutter Software, which results in a lower n.

**Table II. Calculated Cl<sup>-</sup> reversal potential for D1R- or D2R-MSNs in the nucleus accumbens shell.** Cl<sup>-</sup> reversal potential was calculated in the whole-cell patch-clamp configuration using cesium methanesulfonate internal solution with bath application of aCSF+NBQX (2 $\mu$ M) and AP5 (50  $\mu$ M). Whole-cell patch clamp configuration was used to mimic the approach used in spontaneous EPSC and IPSC recordings (Fig. 2). The values were corrected with a junction potential of 10.4 mV ( $V_m = V_p - V_L$  where  $V_m$ =the membrane voltage,  $V_p$ =the calculated voltage, and  $V_L$  is the voltage of the liquid junction potential) (Figl et al., 2003). N/m=number of cells/number of animals.

| <b>Saline</b>                  |                            | <b>Morphine</b>            |                            |
|--------------------------------|----------------------------|----------------------------|----------------------------|
| D1R-MSN                        | D2R-MSN                    | D1R-MSN                    | D2R-MSN                    |
| -59.09 $\pm$ 1.2 mV;<br>n=10/7 | -60.98 $\pm$ 1.5 mV; n=8/5 | -59.19 $\pm$ 1.7 mV; n=5/4 | -60.94 $\pm$ 1.0 mV; n=4/4 |



**Table III. Sex comparisons within electrophysiological assessments investigating morphine-induced changes in synaptic and intrinsic properties of D1R- or D2R-MSNs.**

| Experiment                      | Saline         |                 | P Value | D1R            |                 | P Value | Morphine D1R   |                 | P Value | Morphine D2R   |                 | P Value |
|---------------------------------|----------------|-----------------|---------|----------------|-----------------|---------|----------------|-----------------|---------|----------------|-----------------|---------|
|                                 | Male           | Female          |         | Male           | Female          |         | Male           | Female          |         | Male           | Female          |         |
| <b>mEPSC Frequency (Fig. 1)</b> | 6.67±0.51 (6)  | 6.82±0.68 (6)   | 0.86    | 6.32±1.43 (5)  | 5.55±1.40 (7)   | 0.71    | 5.17±0.55 (4)  | 4.61±0.61 (7)   | 0.58    | 3.33±0.44 (8)  | 2.30±0.28 (3)   | 0.21    |
| <b>mEPSC Amplitude (Fig. 1)</b> | 15.12±1.34 (6) | 14.34±1.14 (6)  | 0.67    | 12.48±1.10 (5) | 13.55±1.07 (7)  | 0.51    | 14.58±1.29 (4) | 14.15±0.83 (7)  | 0.78    | 12.28±0.56 (8) | 11.50±0.51 (3)  | 0.46    |
| <b>E/I Ratio (Fig. 2)</b>       | 0.22±0.06 (2)  | 0.37±0.10 (9)   | 0.50    | 0.28±0.05 (2)  | 0.46±0.14 (7)   | 0.52    | 0.25±0.10 (3)  | 0.38±0.09 (8)   | 0.47    | 0.09±0.03 (2)  | 0.32±0.06 (8)   | 0.12    |
| <b>mIPSC Frequency (Fig. 3)</b> | 1.10±0.17 (5)  | 1.41±0.18 (13)  | 0.35    | 1.55±0.21 (4)  | 1.97±0.20 (10)  | 0.26    | 1.21±0.15 (5)  | 1.03±0.12 (12)  | 0.43    | 0.91±0.12 (4)  | 1.05±0.10 (16)  | 0.50    |
| <b>mIPSC Amplitude (Fig. 3)</b> | 31.44±2.46 (5) | 31.39±1.94 (13) | 0.99    | 34.20±3.91 (4) | 35.57±4.30 (10) | 0.85    | 30.62±2.09 (5) | 28.09±2.63 (12) | 0.57    | 33.27±4.57 (4) | 41.07±2.47 (16) | 0.17    |
| <b>IME (450pA) (Fig. 4)</b>     | 2.43±0.20 (7)  | 2.75±0.48 (4)   | 0.49    | 4.29±0.97 (7)  | 2.50±0.29 (4)   | 0.21    | 2.86±0.40 (7)  | 4.20±1.36 (5)   | 0.30    | 5.67±0.88 (6)  | 6.38±0.65 (8)   | 0.52    |

Number of cells (n). Student's t-test was used for statistical measures. Abbrev.: Miniature excitatory postsynaptic current, mEPSC; excitatory to inhibitory ratio, E/I ratio; miniature inhibitory postsynaptic current, mIPSC; intrinsic membrane excitability, IME.

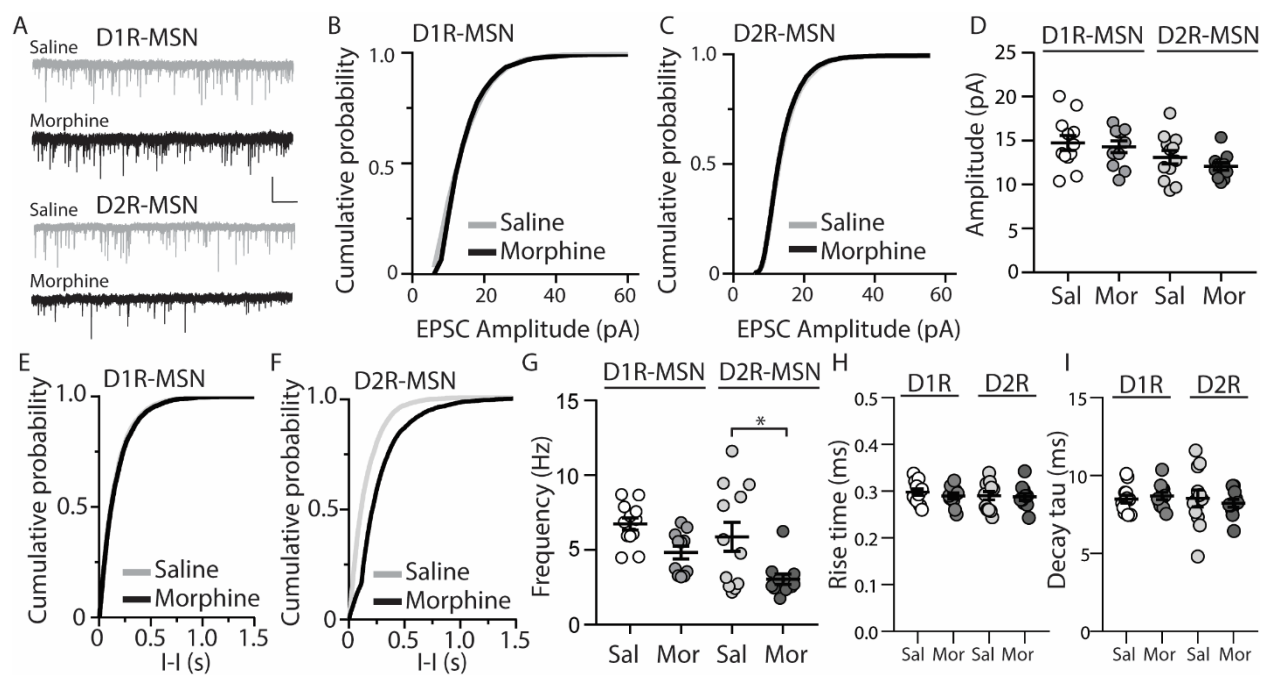

Figure 1.

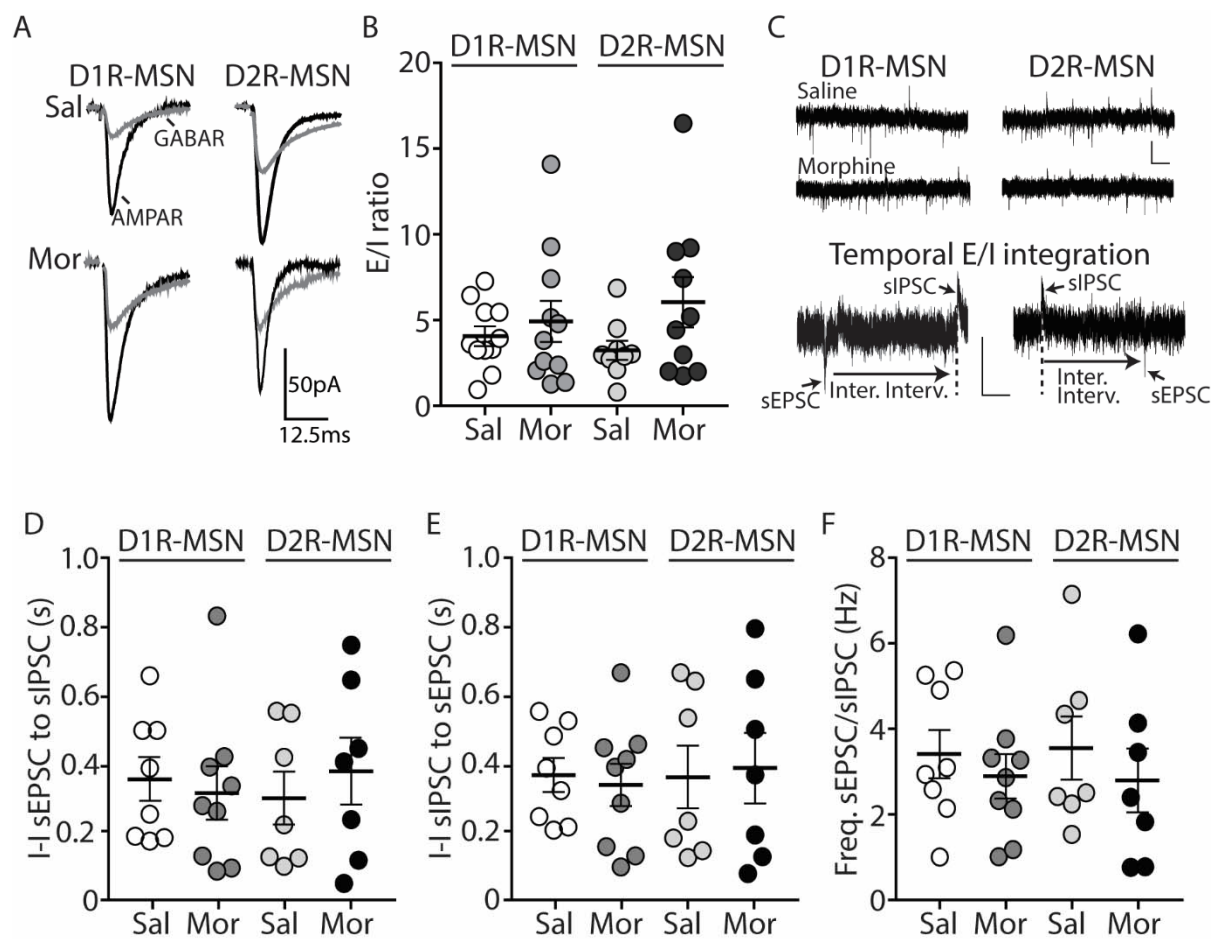

Figure 2.

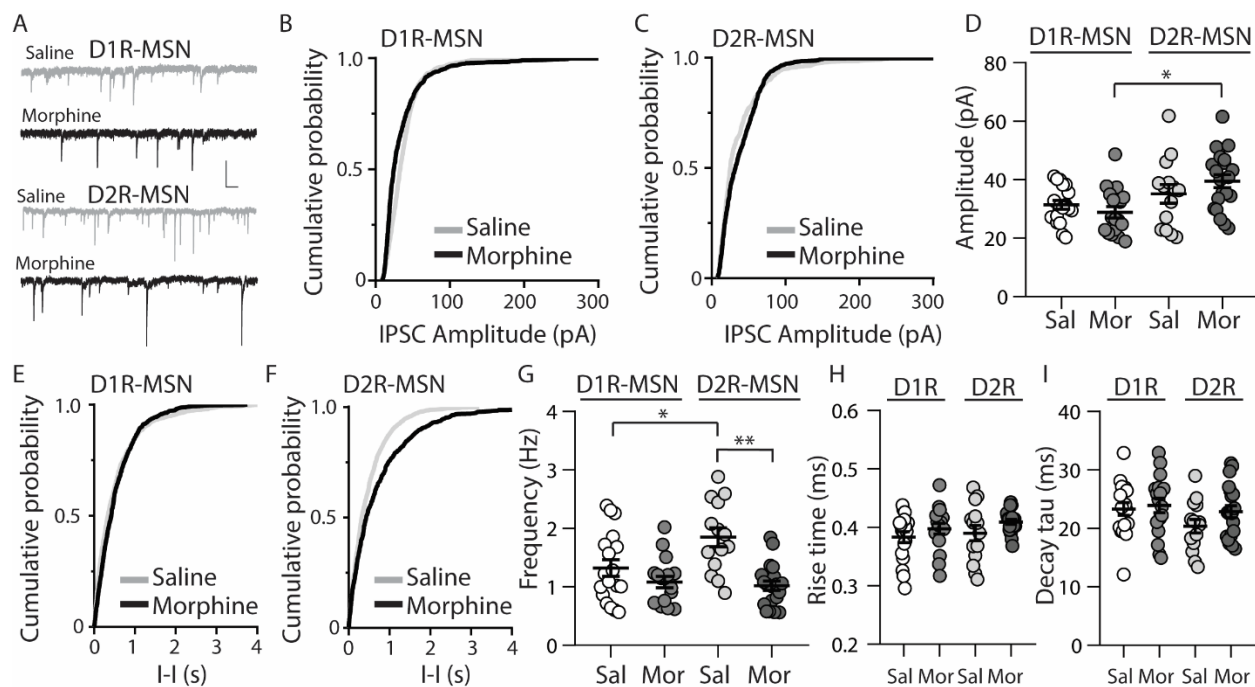

Figure 3.

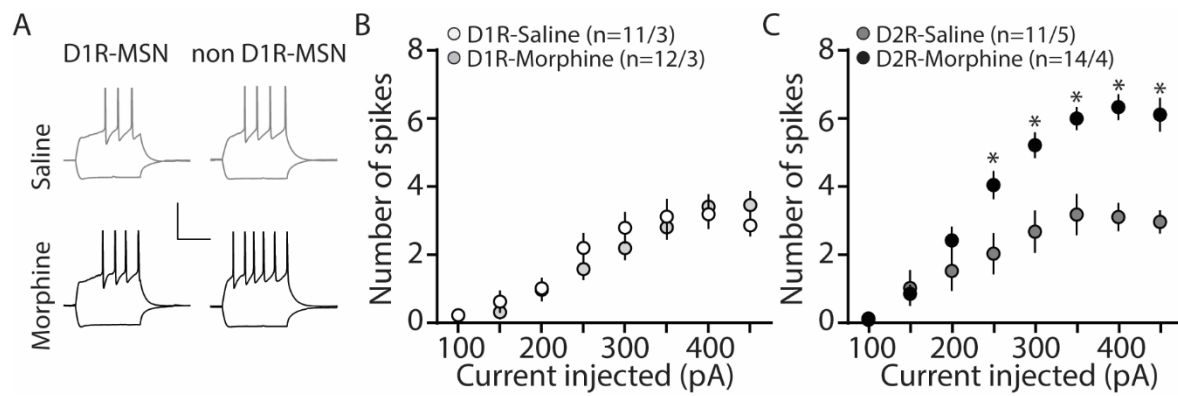

Figure 4.

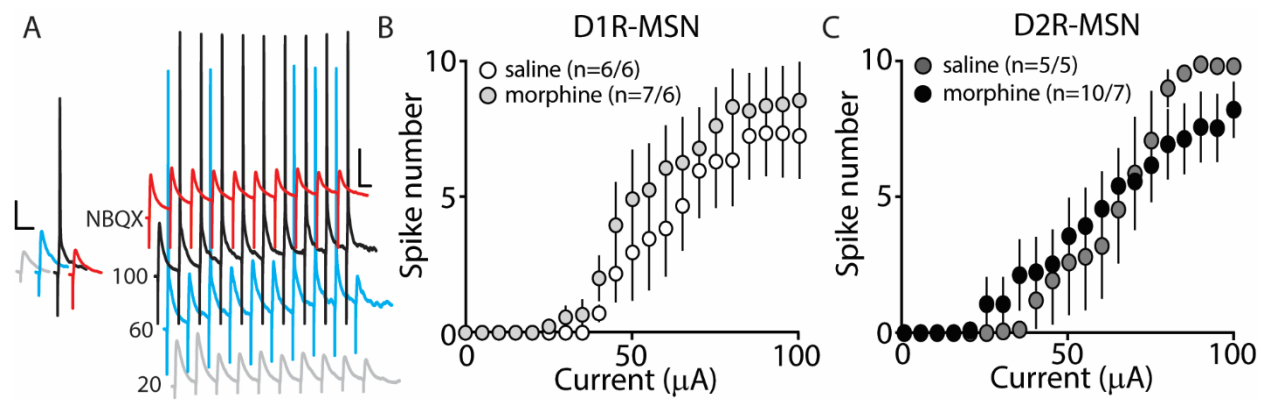

Figure 5.

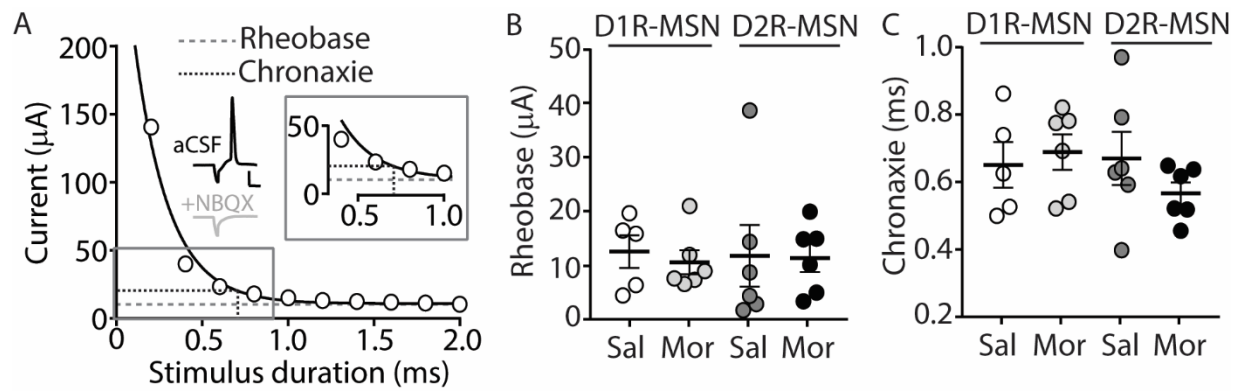

Figure 6.
